# Supplementary material for: Solution processed non-volatile top-gate polymer field-effect transistors
Source: Royal Society of Chemistry journal article supplement (doi:10.1039/c1jm10966a), 2011-01-01

## Supporting Information

### **Solution processed non-volatile top-gate polymer field-effect transistors**

**Wei Lin Leong,<sup>a,†</sup> Nripan Mathews,<sup>\*</sup> Bertha Tan,<sup>b</sup> Subramanian Vaidyanathan,<sup>b</sup> Florian Dötz<sup>b</sup> and Subodh Mhaisalkar<sup>a\*</sup>**

<sup>a</sup> *School of Materials Science and Engineering, Nanyang Technological University, Singapore 639798, Singapore. E-mail: subodh@ntu.edu.sg*

<sup>b</sup> *BASF Global Research Center Singapore, Science Park Road 61, Singapore 112575, Singapore.*

<sup>†</sup>*Present address: Center for Polymers & Organic Solids, University of California, Santa Barbara, California 93106-7150, USA.*

**Figure S1.** (a) Transfer characteristics obtained after different gate pulse conditions for control GSID 1208719 transistor (pure PS-b-P4VP and 50wt% Cytop as dielectric stack layers). The channel length and width was 150  $\mu\text{m}$  and 500  $\mu\text{m}$  respectively.

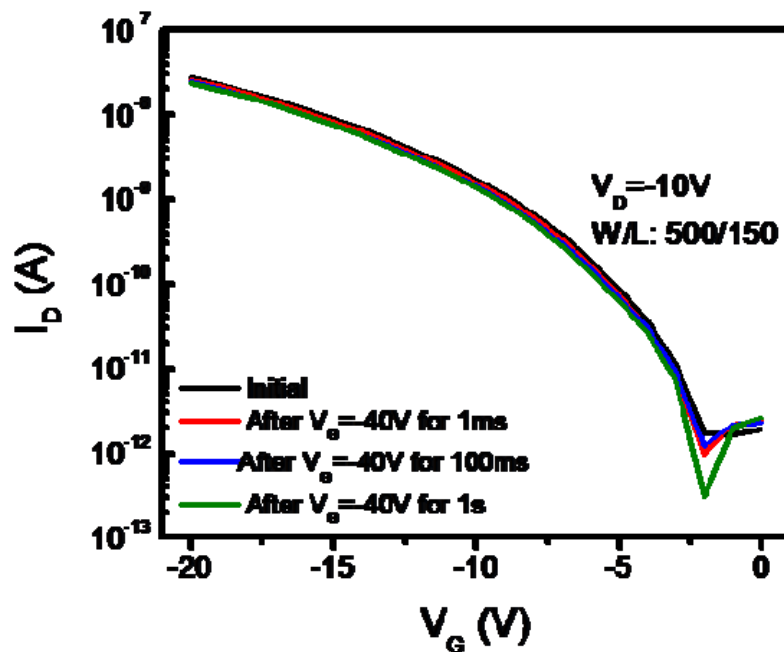

**Figure S2.** (a, b) Transfer characteristics obtained after a gate pulse voltage of -30V for 1ms with different magnitude of gate leakage current levels. The gate leakage currents are plotted in dotted lines. 50wt% Cytop was used as the control dielectric layer. The molar ratio of Au<sup>3+</sup>:P4VP is 0.2.

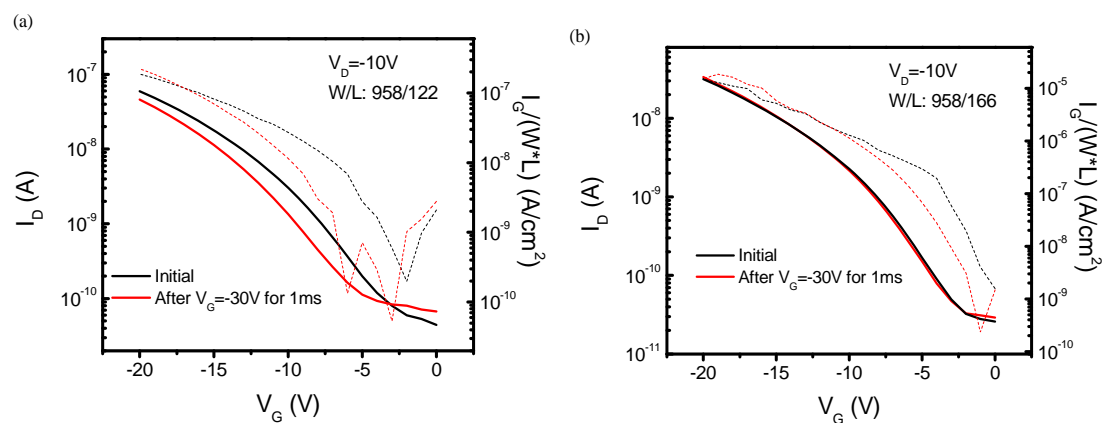

**Figure S3.** Transfer characteristics of GSID 1208719 top-gate transistor memory on PET substrate obtained after a gate pulse voltage of -15V for 1ms (left). The channel length and width was 30  $\mu\text{m}$  and 500  $\mu\text{m}$  respectively. The gate leakage currents are plotted in dotted lines. Digital camera image of the flexible top-gate transistor memory on PET substrate (right). The molar ratio of  $\text{Au}^{3+}$ :P4VP is 0.3.

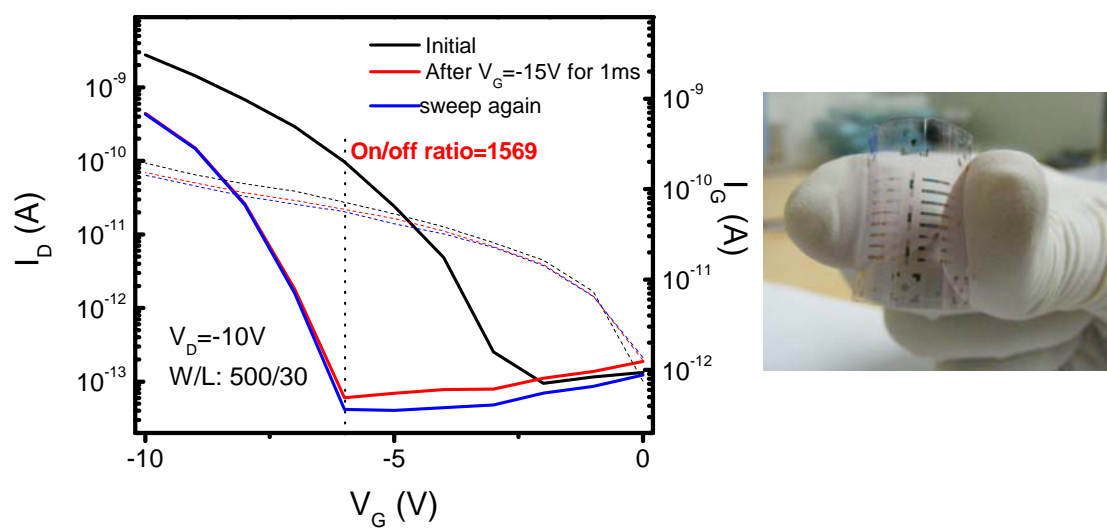

**Figure S4.** Transfer characteristics obtained after different gate pulse conditions for (a) control P3HT transistor channel length of 30  $\mu\text{m}$  and width of 500  $\mu\text{m}$ . (b) top-gate P3HT memory transistor with channel length of 60  $\mu\text{m}$  and width of 1200  $\mu\text{m}$ . The drain voltage,  $V_D$ , is -5V. The transfer characteristic of pristine device is black curve. The molar ratio of  $\text{Au}^{3+}$ :P4VP is 0.2.

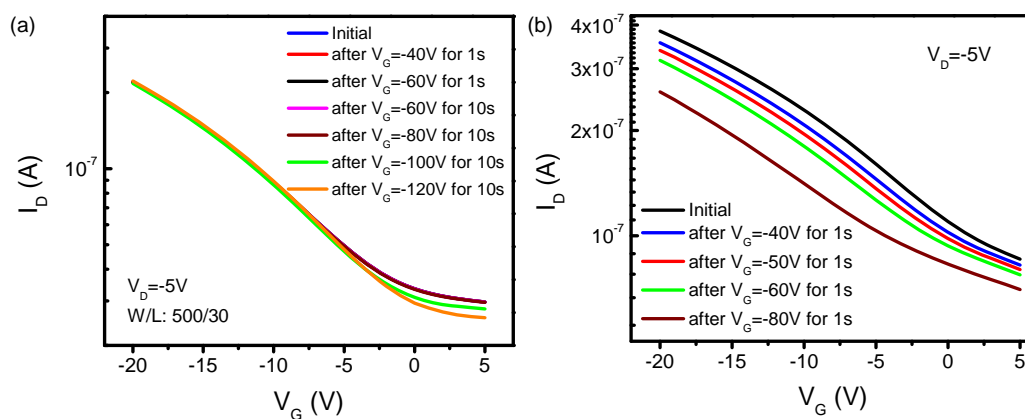

Supplement: c1jm10966a.pdf [file c1jm10966a.pdf]
